# Supplementary material for: The Association of Waminoa with Reef Corals in Singapore and Its Impact on Putative Immune- and Stress-Response Genes
Source: MDPI journal article supplement (doi:10.3390/d14040300), 2022-04-15
Supplement: s1 [file s1]

## Supplementary Materials

**Table S1.** Symbiodiniaceae nucleotide databases.

| Species                             | Type          | Reference |
|-------------------------------------|---------------|-----------|
| <i>Symbiodinium minutum</i>         | Gene models   | [1]       |
| <i>Symbiodinium kawagutii</i>       | Gene models   | [2]       |
| <i>Symbiodinium microadriaticum</i> | Gene models   | [3]       |
| <i>Symbiodinium microadriaticum</i> | Genome        | [3]       |
| <i>Symbiodinium aenigmaticum</i>    | Transcriptome | [4]       |
| <i>Symbiodinium minutum</i>         | Transcriptome | [4]       |
| <i>Symbiodinium pseudominutum</i>   | Transcriptome | [4]       |
| <i>Symbiodinium psymphilum</i>      | Transcriptome | [4]       |

1. Shoguchi, E.; Tanaka, M.; Shinzato, C.; Kawashima, T.; Satoh, N. A genome-wide survey of photoreceptor and circadian genes in the coral, *Acropora digitifera*. *Gene* **2013**, *515*, 426-431.
2. Lin, S.; Cheng, S.; Song, B.; Zhong, X.; Lin, X.; Li, W.; et al. The *Symbiodinium kawagutii* genome illuminates dinoflagellate gene expression and coral symbiosis. *Science*, **2015**, *350*, 691-694.
3. Aranda, M.; Li, Y.; Liew, Y.J.; Baumgarten, S.; Simakov, O.; Wilson, M.C.; et al. Genomes of coral dinoflagellate symbionts highlight evolutionary adaptations conducive to a symbiotic lifestyle. *Sci. Rep.* **2016**, *6*, 1-15.
4. Parkinson, J.E.; Baumgarten, S.; Michell, C.T.; Baums, I.B.; LaJeunesse, T.C.; Voolstra, C.R. Gene expression variation resolves species and individual strains among coral-associated dinoflagellates within the genus *Symbiodinium*. *Genome Biol. Evol.* **2016**, *8*, 665-680.

**Table S2.** RT-qPCR Mastermix used for determining gene expression and efficiency.

| Reagent                                    | Volume per reaction (μl) |                 |
|--------------------------------------------|--------------------------|-----------------|
|                                            | Gene expression          | Gene efficiency |
| SsoAdvanced™ Inhibitor-Tolerant SYBR Green |                          |                 |
| Supermix                                   | 10                       | 5.2             |
| Forward primer 10 μM                       | 0.4                      | 0.2             |

|                                |     |     |
|--------------------------------|-----|-----|
| Reverse primer 10 $\mu$ M      | 0.4 | 0.2 |
| cDNA template                  | 1   | 1   |
| Nuclease-free H <sub>2</sub> O | 3.2 | 3.4 |
| Total reaction mix volume      | 14  | 10  |

**Table S3.** Coverage percentage of each coral genus in the two sites and in the whole study area.

| Coral genus           | Coverage (%) |             |             |
|-----------------------|--------------|-------------|-------------|
|                       | Total area   | Pulau Hantu | Kusu Island |
| <i>Pectinia</i>       | 10.93        | 13.34       | 8.20        |
| <i>Dipsastraea</i>    | 9.18         | 7.97        | 10.55       |
| <i>Merulina</i>       | 7.90         | 10.40       | 5.08        |
| <i>Pachyseris</i>     | 5.14         | 4.33        | 6.05        |
| <i>Goniopora</i>      | 5.05         | 8.32        | 1.37        |
| <i>Platygyra</i>      | 4.96         | 4.16        | 5.86        |
| <i>Favites</i>        | 4.78         | 2.77        | 7.03        |
| <i>Galaxea</i>        | 4.59         | 4.51        | 4.69        |
| <i>Heliopora</i>      | 4.22         | 0.35        | 8.59        |
| <i>Goniastrea</i>     | 3.67         | 4.68        | 2.54        |
| <i>Porites</i>        | 3.58         | 2.77        | 4.49        |
| <i>Lobophyllia</i>    | 3.40         | 2.60        | 4.30        |
| <i>Montipora</i>      | 3.40         | 1.04        | 6.05        |
| <i>Turbinaria</i>     | 3.21         | 1.91        | 4.69        |
| <i>Pavona</i>         | 2.66         | 4.33        | 0.78        |
| <i>Cyphastrea</i>     | 2.48         | 4.51        | 0.20        |
| <i>Echinopora</i>     | 2.48         | 3.64        | 1.17        |
| <i>Fungia</i>         | 2.02         | 2.77        | 1.17        |
| <i>Podabacia</i>      | 1.93         | 2.77        | 0.98        |
| <i>Oxypora</i>        | 1.56         | 1.39        | 1.76        |
| <i>Diploastrea</i>    | 1.29         | 0.87        | 1.76        |
| <i>Lithophyllon</i>   | 1.19         | 1.56        | 0.78        |
| <i>Hydnophora</i>     | 1.10         | 0.69        | 1.56        |
| <i>Astreopora</i>     | 0.92         | 1.56        | 0.20        |
| <i>Fimbriaphyllia</i> | 0.92         | 1.39        | 0.39        |
| <i>Herpolitha</i>     | 0.92         | 1.73        | 0.00        |
| <i>Leptoria</i>       | 0.92         | 0.52        | 1.37        |
| <i>Acropora</i>       | 0.83         | 0.17        | 1.56        |

|                      |      |      |      |
|----------------------|------|------|------|
| <i>Ctenactis</i>     | 0.83 | 0.87 | 0.78 |
| <i>Plerogyra</i>     | 0.83 | 1.21 | 0.39 |
| <i>Coscinaraea</i>   | 0.73 | 0.35 | 1.17 |
| <i>Mycedium</i>      | 0.73 | 0.00 | 1.56 |
| <i>Pocillopora</i>   | 0.55 | 0.00 | 1.17 |
| <i>Bernardpora</i>   | 0.28 | 0.35 | 0.20 |
| <i>Psammocora</i>    | 0.28 | 0.00 | 0.59 |
| <i>Acanthastrea</i>  | 0.18 | 0.00 | 0.39 |
| <i>Echinophyllia</i> | 0.18 | 0.17 | 0.20 |
| <i>Danafungia</i>    | 0.09 | 0.00 | 0.20 |
| <i>Leptastrea</i>    | 0.09 | 0.00 | 0.20 |

**Table S4.** Gene efficiency (E) for each analyzed gene (SD: standard deviation).

| Gene                 | E    | E minus SD | E plus SD | Intercept |
|----------------------|------|------------|-----------|-----------|
| <i>C-type lectin</i> | 2.02 | 1.94       | 2.11      | 27.6      |
| <i>C3</i>            | 2.12 | 2.07       | 2.22      | 30.0      |
| <i>Hsp70</i>         | 2.04 | 2.16       | 2.16      | 30.4      |
| <i>Actin</i>         | 2.20 | 2.1        | 2.36      | 29.1      |

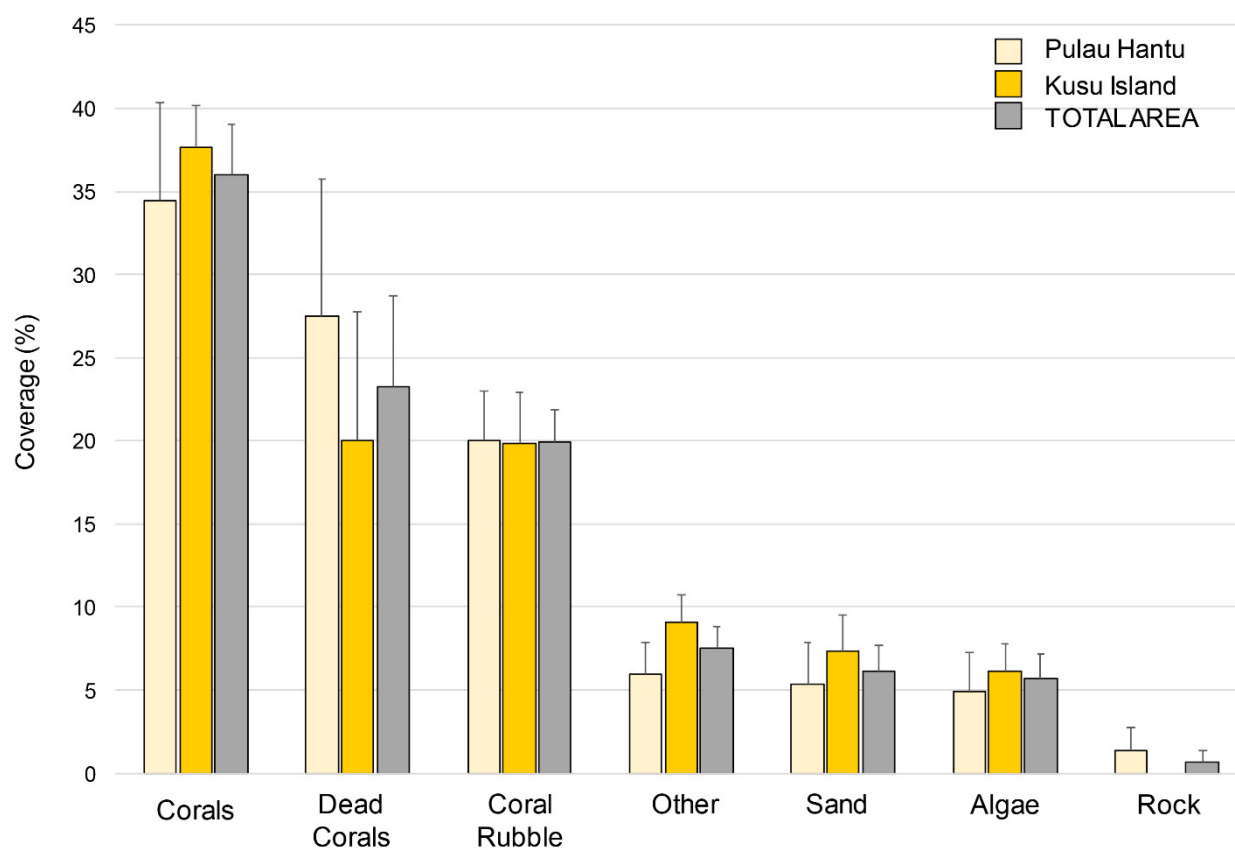

**Figure S1.** Coverage percentage of the different benthic categories in the two sites analyzed and in the whole study area. Data are expressed as the mean  $\pm$  SEM.

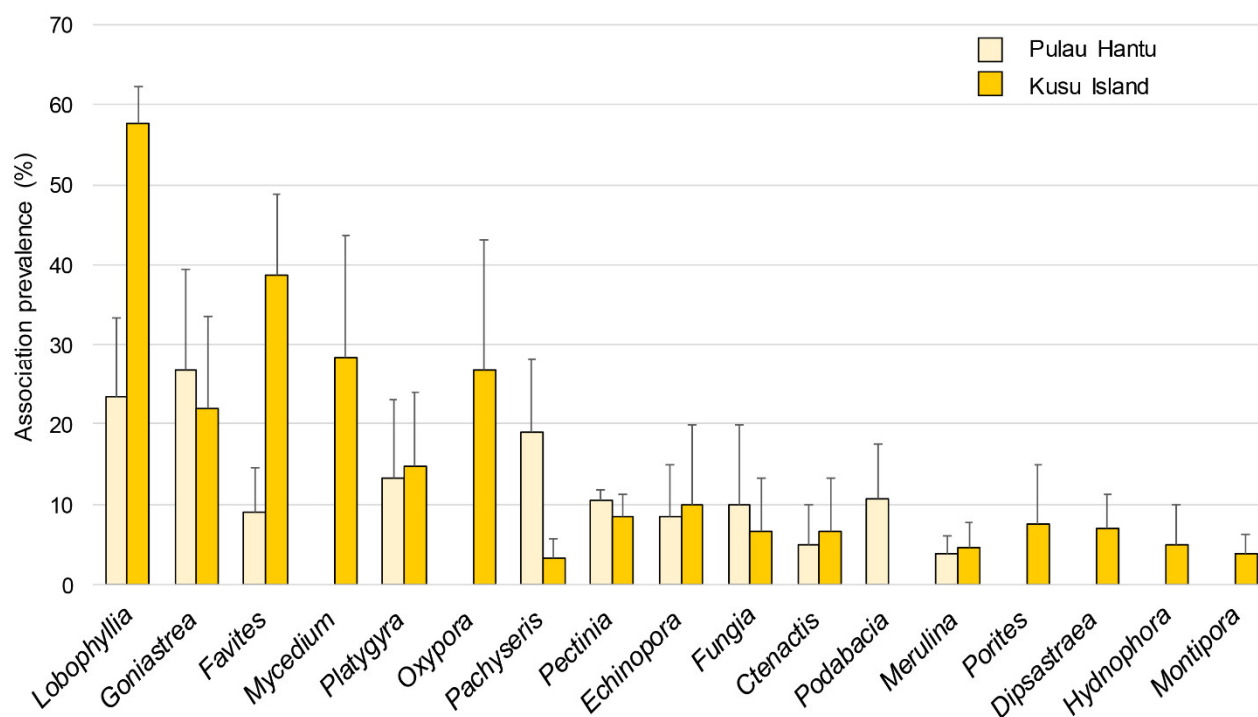

**Figure S2.** Prevalence (%) of *Waminoa* sp.-corals association by coral genus in the two sites. Data are expressed as the mean  $\pm$  SEM.
